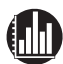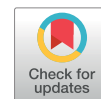

# Adiposity Impacts Intrarenal Hemodynamic Function in Adults With Long-standing Type 1 Diabetes With and Without Diabetic Nephropathy: Results From the Canadian Study of Longevity in Type 1 Diabetes

Diabetes Care 2018;41:831–839 | <https://doi.org/10.2337/dc17-2475>

Petter Bjornstad,<sup>1,2</sup> Julie A. Lovshin,<sup>1,3</sup> Yuliya Lytvyn,<sup>1</sup> Genevieve Boulet,<sup>4</sup> Leif E. Lovblom,<sup>4</sup> Omar N. Alhuzaim,<sup>4</sup> Mohammed A. Farooqi,<sup>4</sup> Vesta Lai,<sup>1</sup> Josephine Tse,<sup>1</sup> Leslie Cham,<sup>1</sup> Andrej Orszag,<sup>4</sup> Daniel Scarr,<sup>4</sup> Alanna Weisman,<sup>4</sup> Hillary A. Keenan,<sup>5</sup> Michael H. Brent,<sup>6</sup> Narinder Paul,<sup>7</sup> Vera Bril,<sup>8</sup> Bruce A. Perkins,<sup>3,4</sup> and David Z.I. Cherney<sup>1,9</sup>

## OBJECTIVE

Central adiposity is considered to be an important cardiorenal risk factor in the general population and in type 1 diabetes. We sought to determine the relationship between central adiposity and intrarenal hemodynamic function in adults with long-standing type 1 diabetes with and without diabetic nephropathy (DN).

## RESEARCH DESIGN AND METHODS

Patients with type 1 diabetes ( $n = 66$ , duration  $\geq 50$  years) and age-/sex-matched control subjects ( $n = 73$ ) were studied. The cohort was stratified into 44 DN Resistors (estimated glomerular filtration rate [eGFR]  $>60$  mL/min/1.73 m<sup>2</sup> and  $<30$  mg/day urine albumin) and 22 patients with DN (eGFR  $\leq 60$  mL/min/1.73 m<sup>2</sup> or  $\geq 30$  mg/day urine albumin). Intrarenal hemodynamic function (glomerular filtration rate for inulin [GFR<sub>INULIN</sub>], effective renal plasma flow for *p*-aminohippuric acid [ERPF<sub>PAH</sub>]) was measured. Afferent arteriolar resistance, efferent arteriolar resistance, renal blood flow, renal vascular resistance [RVR], filtration fraction, and glomerular pressure were derived from the Gomez equations. Fat and lean mass were quantified by DXA.

## RESULTS

Whereas measures of adiposity did not associate with GFR<sub>INULIN</sub> or ERPF<sub>PAH</sub> in healthy control subjects, trunk fat mass inversely correlated with GFR<sub>INULIN</sub> ( $r = -0.46$ ,  $P < 0.0001$ ) and ERPF<sub>PAH</sub> ( $r = -0.31$ ,  $P = 0.01$ ) and positively correlated with RVR ( $r = 0.53$ ,  $P = 0.0003$ ) in type 1 diabetes. In analyses stratified by DN status, greater central adiposity related to lower GFR<sub>INULIN</sub> values in DN and DN Resistors, but the relationships between central adiposity and ERPF<sub>PAH</sub> and RVR were attenuated and/or reversed in patients with DN compared with DN Resistors.

## CONCLUSIONS

The adiposity-intrarenal hemodynamic function relationship may be modified by the presence of type 1 diabetes and DN, requiring further study of the mechanisms by which adiposity influences renal hemodynamic function.

<sup>1</sup>Division of Nephrology, Department of Medicine, University of Toronto, Toronto, Ontario, Canada

<sup>2</sup>Division of Endocrinology, Department of Pediatrics, University of Colorado, Aurora, CO

<sup>3</sup>Division of Endocrinology and Metabolism, Department of Medicine, University of Toronto, Toronto, Ontario, Canada

<sup>4</sup>Lunenfeld-Tanenbaum Research Institute, Mount Sinai Hospital, Toronto, Ontario, Canada

<sup>5</sup>Research Division, Joslin Diabetes Center, Boston, MA

<sup>6</sup>Department of Ophthalmology and Vision Sciences and Department of Medicine, University of Toronto, Toronto, Ontario, Canada

<sup>7</sup>Division of Cardiothoracic Radiology, Joint Department of Medical Imaging, University Health Network, Toronto, Ontario, Canada

<sup>8</sup>The Ellen and Martin Prosserman Centre for Neuromuscular Diseases, Krembil Neuroscience Centre, Division of Neurology, Department of Medicine, University Health Network, University of Toronto, Toronto, Ontario, Canada

<sup>9</sup>Department of Physiology, University of Toronto, Toronto, Ontario, Canada

Corresponding author: Petter Bjornstad, [petter.bjornstad@childrenscolorado.org](mailto:petter.bjornstad@childrenscolorado.org).

Received 28 November 2017 and accepted 9 January 2018.

This article contains Supplementary Data online at <http://care.diabetesjournals.org/lookup/suppl/doi:10.2337/dc17-2475/-/DC1>.

© 2018 by the American Diabetes Association. Readers may use this article as long as the work is properly cited, the use is educational and not for profit, and the work is not altered. More information is available at <http://www.diabetesjournals.org/content/license>.

Diabetic nephropathy (DN) remains a major cause of end-stage renal disease (ESRD) and cardiovascular disease (1). Central adiposity is considered to be an important cardiorenal risk factor that is augmented by intensive insulin therapy and is increasingly recognized in people with type 1 diabetes (2,3). In fact, the obesity epidemic is affecting youth and adults with type 1 diabetes (4–7), increasing their lifetime risk for early death due to cardiorenal disease (8).

Epidemiologic data also indicate that greater centrally distributed fat may paradoxically offer cardiac and renal protection (9) in people with chronic kidney disease (CKD) and ESRD, especially in the elderly (10). This paradoxical relationship is termed the “central obesity paradox,” although it is a misnomer because the phenomenon is not limited to obese individuals (11). The mechanisms whereby increased adiposity mediates nephroprotection remains unclear, but proposed explanations include better hemodynamic stability, altered cytokine profiles, and more effective sequestration of uremic toxins (12). It is unknown whether central adiposity confers nephroprotection in people with long-standing type 1 diabetes and DN.

Epidemiologic studies are limited to estimating glomerular filtration rate (GFR), which may correlate poorly with measured GFR, and have not provided data on effective renal plasma flow (ERPF) or other parameters of intrarenal hemodynamic function, including renal blood flow (RBF), renal vascular resistance (RVR), and filtration fraction (FF), glomerular pressure ( $P_{GLO}$ ), afferent arteriolar resistance ( $R_A$ ), and efferent arteriolar resistance ( $R_E$ ). There are a few human studies examining the interactions between intrarenal hemodynamic function and central adiposity (13,14), but, to our knowledge, no such studies in adults with long-standing type 1 diabetes with and without DN have been performed.

Accordingly, the aim of this study was to define the relationships between central adiposity by DXA and intrarenal hemodynamic function measured by *p*-aminohippuric acid (PAH) and inulin clearance. We hypothesized that central adiposity would negatively correlate with GFR and ERPF, and positively correlate with RVR in adults with type 1 diabetes. Finally, we hypothesized that these associations would differ among adults with type 1 diabetes with and without DN,

which would be consistent with the central obesity paradox.

## RESEARCH DESIGN AND METHODS

### Study Design

This was a cross-sectional cohort evaluation of 75 participants with type 1 diabetes with a duration of  $\geq 50$  years with DN and without DN (DN Resistors) and 75 age- and sex-matched control subjects to determine mechanisms of nephropathy resistance and to clinically phenotype nephropathy, retinopathy, neuropathy, and macrovascular disease for future biomarker studies. This represents an exploratory analysis within the second phase of the Canadian Study of Longevity in Type 1 Diabetes.

### Study Population

Participants with type 1 diabetes were recruited from among those who took part in the mail-based survey of the first phase of the Canadian Study of Longevity in Type 1 Diabetes, whereas control subjects without diabetes were friends or family members of the participants with type 1 diabetes or were recruited through community advertisement. Inclusion criteria for the participants with type 1 diabetes included a duration of  $\geq 50$  years of type 1 diabetes, inclusion criteria for control subjects without diabetes included any race and sex-matched 1:1 within 5 years of age of a participant with type 1 diabetes, and an inclusion criterion common to both control subjects without diabetes and participants with type 1 diabetes was the ability to understand and cooperate with study procedures. Exclusion criteria for control subjects without diabetes included the presence of the following: 1) diabetes or a fasting plasma glucose concentration  $> 7.0$  mmol/L or 2) preexisting kidney disease, microalbuminuria, or estimated GFR (eGFR)  $< 45$  mL/min/1.73 m<sup>2</sup>. Exclusion criteria common to both control subjects without diabetes and participants with type 1 diabetes were any current eye infection, corneal damage, severe movement disorder, or propacaine allergy that would preclude safe in vivo corneal confocal microscopy examination. The study participants were recruited consecutively. All participants provided written informed consent, and the study and its procedures were approved by the institutional ethics board of the University Health Network and

Mount Sinai Hospital in Toronto, ON, Canada. Sixty-six participants with type 1 diabetes and 73 control subjects without diabetes had data available for intrarenal hemodynamic function and lean and fat mass, and were included in the analyses.

### Measurement of Intrarenal

#### Hemodynamic Function

All participants underwent renin-angiotensin-aldosterone system (RAAS) inhibitor washout 30 days prior to renal measurements, which occurred on Study Day 2 after a screening visit (Study Day 1). Treatment with RAAS inhibitor agents (including ACE inhibitors, angiotensin receptor blockers, direct renin inhibitors, and aldosterone antagonists) was discontinued; study staff reviewed daily blood pressure measurements through home monitoring (ambulatory blood pressure meters were provided to participants); and treatment with non-RAAS antihypertensive agents was initiated if required, with evaluation of urinary albumin and serum creatinine and potassium (15,16). For 7 days prior to the infusion, participants were instructed to maintain a minimum sodium intake of 150 mmol/day and a protein diet of 1.5 g/kg/day. Compliance was evaluated by measurement of 24-h urine sodium and urea excretion on the 7th day (15,16). Participants with type 1 diabetes and control subjects without diabetes underwent the same procedures, except that participants with type 1 diabetes underwent a euglycemic clamp during the morning of Study Day 2 prior to and during measurements of renal hemodynamic function. During the euglycemic clamp, blood glucose level was measured every 10–15 min, and the insulin infusion was titrated to achieve a blood glucose concentration between 4 and 6 mmol/L for  $\sim 4$  h prior to and during the renal measurements.

Patients arrived at the Renal Physiology Laboratory (University Health Network, University of Toronto, Toronto, ON, Canada) at  $\sim 0800$  h. After a brief physical examination and body weight measurements were performed, a venous catheter was placed in the antecubital vein (or dorsal metacarpal vein) of the nondominant arm for blood sampling (with patients in a semirecumbent position). A second venous catheter was placed in the opposite arm (antecubital or dorsal metacarpal) of participants with diabetes for the infusion of dextrose (5% dilution) or

insulin (0.2 units/mL dilution) as part of the euglycemic clamp. After a rest period of ~15 min, blood work (HbA<sub>1c</sub>, blood glucose, electrolytes, lipids, creatinine, urea, uric acid, aldosterone, and plasma renin concentration) and urine parameters (albumin, protein, electrolytes) were collected, and vital signs were measured at the bedside. Blood work and urine analysis were performed using conventional assay methods by the Department of Clinical Biochemistry at the University Health Network. Ad libitum water consumption was allowed during the experimental period, up to a maximum of 500 mL. Patients remained supine throughout the study and during measurements, but could ambulate for voiding. Blood pressure was measured with an automated sphygmomanometer (53000 Vital Signs Monitor; Welch-Allyn Inc.) at the same time that blood was drawn for analysis of renal hemodynamic parameters. The average of two values was used to assess systolic, diastolic, and mean arterial blood pressure at each time point (GFR for inulin [GFR<sub>INULIN</sub>] and ERPF for PAH [ERPF<sub>PAH</sub>] at 60 min and again at 90 min).

Renal hemodynamic function was measured using inulin and PAH clearance techniques standardized per 1.73 m<sup>2</sup> of body surface area, which represent GFR<sub>INULIN</sub> and ERPF<sub>PAH</sub>, respectively (17,18). FF was determined by dividing the GFR<sub>INULIN</sub> by the ERPF<sub>PAH</sub>. RBF was calculated by dividing the ERPF<sub>PAH</sub> by (1 – hematocrit). RVR was derived by dividing the mean arterial pressure (MAP) by the RBF. Intrarenal hemodynamics (R<sub>A</sub>, R<sub>E</sub>, and P<sub>GLO</sub>) were estimated using Gomez equations, as described previously (19).

#### Determination of DN Resistor Status

For analysis, participants with type 1 diabetes were categorized as DN Resistors if they had an eGFR for MDRD (eGFR<sub>MDRD</sub>) ≥60 mL/min/1.73 m<sup>2</sup> or 24-h urine albumin excretion <30 mg/day; otherwise, they were assigned to the DN group. The control subjects without diabetes were assigned to the control group irrespective of their eGFR<sub>MDRD</sub> and 24-h urine results.

#### Quantification of Lean and Fat Mass

Body composition was determined by DXA using a Hologic Discovery A Bone Densitometer on Study Day 1. We evaluated whole-body lean and fat mass, in addition to measures of central adiposity

(trunk fat mass, trunk/limb fat ratio, and trunk fat percentage).

#### Statistical Analysis

Statistical analyses were performed using SAS version 9.4 for Windows (SAS Institute, Cary, NC). Continuous variables were assessed for normality (Shapiro-Wilk test and inspection of histograms). Comparisons of clinical characteristics among control subject, DN Resistor, and DN subgroups were made using ANOVA, the Kruskal-Wallis test, or the  $\chi^2$  test, depending on variable distribution. Pearson correlation and generalized linear regression models (unadjusted and adjusted for age, sex, HbA<sub>1c</sub>, and systolic blood pressure [SBP]) were used to examine the relationships between measures of central adiposity and intrarenal hemodynamic function. We examined the sex-adjusted means of GFR, ERPF, and RVR across tertiles of trunk fat percentage. Analyses were considered to be exploratory and hypothesis generating, and adjustments for multiple comparisons were not used. An  $\alpha$ -level of 0.05 was used for tests of statistical significance.

## RESULTS

#### Baseline Characteristics

There were no differences in mean age (66 ± 8 vs. 65 ± 8 years,  $P = 0.41$ ) or sex distribution (41% vs. 43% women,  $P = 0.74$ ) between adults with and without type 1 diabetes. RAAS inhibitor use was present in 82% of patients with type 1 diabetes and 14% of control subjects. Based on nephropathy stratification criteria, DN subgroups had low eGFR<sub>MDRD</sub> and high 24-h urine albumin excretion levels. eGFR<sub>MDRD</sub> was similar between control subjects and DN Resistors (Table 1).

#### Differences in Fat and Lean Mass Parameters in Adults With and Without Type 1 Diabetes

Compared with adults with type 1 diabetes, control subjects had greater total body fat mass (27.1 ± 9.8 vs. 23.4 ± 7.5 kg,  $P = 0.01$ ), whole-body fat percentage (35.2 ± 8.2% vs. 32.0 ± 8.1%,  $P = 0.02$ ), trunk fat mass (12.9 ± 5.5 vs. 10.9 ± 4.2 kg,  $P = 0.01$ ), and trunk fat percentage (34.0 ± 8.3% vs. 30.0 ± 8.2%,  $P = 0.004$ ). Similar differences were observed with whole-body and trunk fat  $z$  scores between adults with and without type 1 diabetes. No differences were observed for

lean fat mass between adults with and without type 1 diabetes.

#### Differences in Fat and Lean Mass Parameters in Patients With DN and DN Resistors

DN and DN Resistors were of similar age, diabetes duration, and sex distribution (Table 1). Although there was a trend toward greater whole-body and central adiposity in patients with DN compared with DN Resistors, the numerical differences in BMI, trunk fat percentage or whole-body fat percentage, and fat mass did not reach statistical significance.

#### Intrarenal and Systemic Hemodynamic Function

Parameters of intrarenal hemodynamic function across the three groups are shown in Table 1. Compared with patients with DN, DN Resistors had higher baseline GFR<sub>INULIN</sub> and ERPF<sub>PAH</sub> levels. Compared with control subjects, DN Resistors had similar baseline GFR<sub>INULIN</sub>, ERPF<sub>PAH</sub>, and MAP levels. Among the calculated variables, compared with patients with DN, DN Resistors had higher RBF levels, similar FF and P<sub>GLO</sub> levels, and lower R<sub>A</sub> and R<sub>E</sub> levels (Table 1). Compared with control subjects, DN Resistors had higher P<sub>GLO</sub>, lower R<sub>A</sub>, and higher R<sub>E</sub> levels. Baseline RVR was similar between control subjects and DN Resistors, but was markedly higher in patients with DN ( $P < 0.001$ ).

#### Relationships Between Fat and Lean Mass With Intrarenal Hemodynamic Function in Adults With and Without Type 1 Diabetes

In adults with type 1 diabetes, BMI ( $r = -0.32$ ,  $P = 0.009$ ), trunk fat mass ( $r = -0.46$ ,  $P < 0.0001$ ), trunk fat percentage ( $r = -0.42$ ,  $P = 0.0005$ ), whole-body fat mass ( $r = -0.42$ ,  $P = 0.0004$ ), and whole-body fat percentage ( $r = -0.35$ ,  $P = 0.004$ ) were inversely correlated with the GFR<sub>INULIN</sub>, and these associations remained significant after adjusting for age, sex, HbA<sub>1c</sub> level, and SBP (Table 2). Measures of whole-body and fat mass also inversely correlated with ERPF<sub>PAH</sub> and RBF and positively with R<sub>A</sub> and RVR in univariable and multivariable models (Table 2 and Supplementary Table 1). Whole-body lean mass was not associated with intrarenal hemodynamic function in adults with type 1 diabetes.

In adults without type 1 diabetes, BMI, trunk fat mass, trunk fat percentage,

whole-body fat mass, and whole-body fat percentage were not associated with  $GFR_{INULIN}$ ,  $ERPF_{PAH}$ , RVR, or calculated measures of intrarenal hemodynamic function (Table 2 and Supplementary Table 1). Conversely, whole-body lean mass was associated with lower  $R_E$  ( $r = -0.40$ ,  $P = 0.0005$ ), lower FF ( $r = -0.26$ ,  $P = 0.01$ ), and RVR ( $r = -0.25$ ,  $P = 0.04$ ), and these associations remained significant after adjusting for age, sex,  $HbA_{1c}$ , and SBP (Table 2 and Supplementary Table 1). Differences in sex-adjusted  $GFR_{INULIN}$ ,  $ERPF_{PAH}$ , and RVR across tertiles of trunk fat percentage for adults without type 1 diabetes are shown in Fig. 1 and Supplementary Figs. 2 and 3, respectively.

### Relationships Between Fat and Lean Mass With Intrarenal Hemodynamic Function in DN and DN Resistors

In DN, BMI, whole-body fat mass, and whole-body fat percentage were not associated with  $GFR_{INULIN}$  values; however, trunk fat mass ( $r = -0.43$ ,  $P = 0.047$ ), trunk fat percentage ( $r = -0.50$ ,  $P = 0.02$ ), trunk fat z score ( $r = -0.62$ ,  $P = 0.003$ ), and trunk/limb fat ratio ( $r = -0.56$ ,  $P = 0.007$ ) inversely correlated with  $GFR_{INULIN}$  values. The associations between central adiposity and  $GFR_{INULIN}$  remained significant after multivariable adjustments (Table 3). Although the measures of neither central nor whole-body adiposity were associated with  $ERPF_{PAH}$ , whole-body fat, trunk fat mass, trunk fat percentage, and

trunk/limb fat ratio related inversely to FF and  $R_E$  values (Supplementary Table 2).

In DN Resistors, trunk fat mass ( $r = -0.44$ ,  $P = 0.004$ ), trunk percentage fat ( $r = -0.32$ ,  $P = 0.03$ ), and whole-body fat mass ( $r = -0.41$ ,  $P = 0.007$ ) inversely correlated with  $GFR_{INULIN}$  values. All measures of whole-body and central adiposity inversely correlated with  $ERPF_{PAH}$  and RBF (Table 3). Trunk fat mass, trunk fat percentage, and whole-body fat were negatively associated with  $P_{GLO}$  values. Similar relationships were observed among trunk fat z scores, trunk/limb fat ratio, and  $P_{GLO}$  values. Trunk fat and trunk fat percentage were positively associated with  $R_A$ ,  $R_E$ , and RVR (Supplementary Table 2), and these

**Table 1—Clinical and biochemical characteristics of the study participants**

|                                                               | Control subjects<br>(n = 73) | DN Resistors<br>(n = 44) | DN<br>(n = 22)  | P for trend | P for control subjects vs. DN Resistors | P for DN Resistors vs. DN |
|---------------------------------------------------------------|------------------------------|--------------------------|-----------------|-------------|-----------------------------------------|---------------------------|
| <b>Clinical characteristics</b>                               |                              |                          |                 |             |                                         |                           |
| Sex (M/F)                                                     | 32/41                        | 22/22                    | 8/14            | 0.57        | 0.52                                    | 0.29                      |
| Age (years)                                                   | 65 ± 8                       | 65 ± 7                   | 68 ± 8          | 0.18        | 0.73                                    | 0.08                      |
| Duration of type 1 diabetes (years)                           |                              | 55 ± 6                   | 55 ± 5          |             |                                         | 0.92                      |
| Weight (kg)                                                   | 75.7 ± 16.2                  | 73.3 ± 12.5              | 73.1 ± 12.1     | 0.60        | 0.39                                    | 0.95                      |
| BMI (kg/m <sup>2</sup> )                                      | 27.2 ± 5.5                   | 26.4 ± 3.5               | 27.0 ± 4.8      | 0.65        | 0.36                                    | 0.61                      |
| RAAS inhibition                                               | 10 (14)                      | 34 (78)                  | 20 (91)         | <0.001      | <0.001                                  | 0.18                      |
| SBP (mmHg)                                                    | 129 ± 19                     | 133 ± 16                 | 134 ± 14        | 0.31        | 0.24                                    | 0.73                      |
| DBP (mmHg)                                                    | 79 ± 10                      | 71 ± 10                  | 69 ± 9          | <0.001      | <0.001                                  | 0.37                      |
| Heart rate (bpm)                                              | 67 ± 9                       | 71 ± 13                  | 69 ± 10         | 0.20        | 0.07                                    | 0.51                      |
| Total daily insulin (units/kg)                                |                              | 0.48 ± 0.16              | 0.49 ± 0.24     |             |                                         | 0.79                      |
| <b>Adiposity</b>                                              |                              |                          |                 |             |                                         |                           |
| Whole-body fat mass (kg)                                      | 27.1 ± 9.9                   | 22.6 ± 7.4               | 25.7 ± 8.2      | 0.04        | 0.01                                    | 0.18                      |
| Whole-body fat percentage (%)                                 | 35.1 ± 8.2                   | 30.8 ± 8.5               | 34.6 ± 7.5      | 0.02        | 0.008                                   | 0.08                      |
| Trunk fat mass (kg)                                           | 13.0 ± 5.5                   | 10.4 ± 3.9               | 12.2 ± 5.1      | 0.03        | 0.009                                   | 0.17                      |
| Trunk fat percentage (%)                                      | 33.8 ± 8.3                   | 28.9 ± 8.6               | 32.5 ± 8.4      | 0.01        | 0.003                                   | 0.11                      |
| Lean mass (kg)                                                | 49.2 ± 11.0                  | 50.6 ± 10.6              | 47.9 ± 8.1      | 0.61        | 0.57                                    | 0.32                      |
| <b>Measured parameters of intrarenal hemodynamic function</b> |                              |                          |                 |             |                                         |                           |
| $GFR_{INULIN}$ (mL/min/1.73 m <sup>2</sup> )                  | 105 ± 19                     | 108 ± 16                 | 93 ± 15         | 0.005       | 0.51                                    | 0.002                     |
| $ERPF_{PAH}$ (mL/min/1.73 m <sup>2</sup> )                    | 497 ± 131                    | 478 ± 101                | 385 ± 70        | <0.001      | 0.39                                    | 0.002                     |
| MAP (mmHg)                                                    | 85 ± 11                      | 88 ± 7                   | 89 ± 8          | 0.18        | 0.19                                    | 0.55                      |
| Hematocrit (L/L)                                              | 0.38 ± 0.04                  | 0.35 ± 0.03              | 0.34 ± 0.03     | <0.001      | <0.001                                  | 0.16                      |
| Plasma protein (g/L)                                          | 61 ± 5                       | 56 ± 6                   | 59 ± 4          | <0.001      | <0.001                                  | 0.02                      |
| RVR (mmHg/L/min · 1,000)                                      | 115 ± 38                     | 125 ± 32                 | 157 ± 30        | <0.001      | 0.15                                    | <0.001                    |
| <b>Derived parameters of intrarenal hemodynamic function</b>  |                              |                          |                 |             |                                         |                           |
| RBF (mL/min/1.73 m <sup>2</sup> )                             | 803 ± 216                    | 742 ± 163                | 584 ± 112       | <0.001      | 0.09                                    | 0.002                     |
| FF (%)                                                        | 0.22 ± 0.04                  | 0.23 ± 0.04              | 0.25 ± 0.05     | 0.01        | 0.13                                    | 0.10                      |
| $P_{GLO}$ (mmHg)                                              | 44.6 ± 2.8                   | 49.3 ± 4.1               | 49.1 ± 3.7      | <0.001      | <0.001                                  | 0.74                      |
| $R_A$ (dyne · s · cm <sup>-5</sup> )                          | 4,448 ± 2,055                | 4,400 ± 1,614            | 5,652 ± 1,622   | <0.001      | 0.89                                    | 0.01                      |
| $R_E$ (dyne · s · cm <sup>-5</sup> )                          | 1,215 ± 267                  | 2,310 ± 451              | 2,592 ± 656     | <0.001      | <0.001                                  | 0.01                      |
| <b>Biochemical characteristics</b>                            |                              |                          |                 |             |                                         |                           |
| $HbA_{1c}$ (%)                                                | 5.7 ± 0.4                    | 7.3 ± 0.8                | 7.6 ± 1.0       | <0.001      | <0.001                                  | 0.03                      |
| $HbA_{1c}$ (mmol/mol)                                         | 39 ± 4                       | 56 ± 9                   | 60 ± 11         | <0.001      | <0.001                                  | 0.03                      |
| Glucose (mmol/L)                                              | 5.4 ± 1.6                    | 8.1 ± 3.4                | 9.4 ± 4.1       | <0.001      | <0.001                                  | 0.09                      |
| eGFR <sub>MDRD</sub> (mL/min/1.73 m <sup>2</sup> )            | 84 ± 14                      | 81 ± 12                  | 57 ± 14         | <0.001      | 0.19                                    | <0.001                    |
| Urine ACR (mg/mmol)                                           | 1.0 [0.7, 2.2]               | 1.0 [0.7, 1.6]           | 9.5 [5.1, 16.3] | <0.001      | 0.69                                    | <0.001                    |

Data are expressed as the mean ± SD, median [interquartile range], or n (%), unless otherwise indicated. ACR, albumin-to-creatinine ratio; DBP, diastolic blood pressure; F, female; M, male.

Table 2—Relationships between adiposity and measured parameters of intrarenal hemodynamic function in adults with and without type 1 diabetes

| Variables                    | Control subjects without diabetes |                        |                        | Patients with type 1 diabetes |                        |                        |
|------------------------------|-----------------------------------|------------------------|------------------------|-------------------------------|------------------------|------------------------|
|                              | GFR <sub>MDUN</sub>               | ERPF <sub>PAH</sub>    | RVR                    | GFR <sub>MDUN</sub>           | ERPF <sub>PAH</sub>    | RVR                    |
| WB adiposity                 |                                   |                        |                        |                               |                        |                        |
| WB fat mass (per kg)         |                                   |                        |                        |                               |                        |                        |
| r                            | −0.12, P = 0.33                   | −0.09, P = 0.45        | 0.12, P = 0.33         | −0.42, P = 0.0004             | −0.31, P = 0.01        | 0.28, P = 0.02         |
| β ± SE*                      | −0.17 ± 0.24, P = 0.49            | 1.01 ± 1.52, P = 0.52  | 0.42 ± 0.45, P = 0.35  | −1.07 ± 0.25, P < 0.0001      | −3.18 ± 1.46, P = 0.03 | 0.97 ± 0.48, P = 0.046 |
| β ± SE†                      | −0.17 ± 0.25, P = 0.49            | 1.00 ± 1.61, P = 0.54  | 0.34 ± 0.46, P = 0.46  | −1.08 ± 0.25, P < 0.0001      | −3.28 ± 1.46, P = 0.03 | 0.94 ± 0.48, P = 0.054 |
| WB fat percentage (per %)    |                                   |                        |                        |                               |                        |                        |
| r                            | −0.18, P = 0.13                   | −0.06, P = 0.60        | 0.26, P = 0.03         | −0.35, P = 0.004              | −0.34, P = 0.006       | 0.29, P = 0.02         |
| β ± SE*                      | −0.46 ± 0.39, P = 0.26            | 0.05 ± 2.58, P = 0.99  | 0.93 ± 0.73, P = 0.19  | −1.43 ± 0.31, P < 0.0001      | −4.32 ± 1.81, P = 0.02 | 1.13 ± 0.60, P = 0.06  |
| β ± SE†                      | −0.49 ± 0.42, P = 0.25            | −0.10 ± 2.72, P = 0.97 | 0.86 ± 0.77, P = 0.27  | −1.43 ± 0.31, P < 0.0001      | −4.33 ± 1.45, P = 0.02 | 1.12 ± 0.60, P = 0.06  |
| BMI (per kg/m <sup>2</sup> ) |                                   |                        |                        |                               |                        |                        |
| r                            | −0.06, P = 0.64                   | 0.23, P = 0.046        | −0.02, P = 0.88        | −0.32, P = 0.009              | −0.18, P = 0.16        | 0.13, P = 0.29         |
| β ± SE*                      | 0.25 ± 0.42, P = 0.56             | 4.58 ± 2.64, P = 0.07  | 0.10 ± 0.78, P = 0.90  | −1.44 ± 0.48, P = 0.004       | −4.49 ± 2.61, P = 0.09 | 1.20 ± 0.86, P = 0.17  |
| β ± SE†                      | 0.28 ± 0.44, P = 0.53             | 5.12 ± 2.77, P = 0.07  | −0.13 ± 0.81, P = 0.87 | −1.46 ± 0.49, P = 0.004       | −4.96 ± 2.64, P = 0.07 | 1.08 ± 0.88, P = 0.22  |
| Central body adiposity       |                                   |                        |                        |                               |                        |                        |
| Trunk fat mass (per kg)      |                                   |                        |                        |                               |                        |                        |
| r                            | −0.13, P = 0.27                   | −0.08, P = 0.51        | 0.11, P = 0.35         | −0.46, P < 0.0001             | −0.31, P = 0.01        | 0.28, P = 0.02         |
| β ± SE*                      | −0.40 ± 0.42, P = 0.35            | 1.10 ± 2.66, P = 0.69  | 0.90 ± 0.78, P = 0.25  | −1.88 ± 0.42, P < 0.0001      | −5.56 ± 2.48, P = 0.03 | 1.68 ± 0.81, P = 0.04  |
| β ± SE†                      | −0.42 ± 0.44, P = 0.35            | 1.04 ± 2.87, P = 0.72  | 0.78 ± 0.82, P = 0.34  | −1.89 ± 0.43, P < 0.0001      | −5.77 ± 2.48, P = 0.02 | 1.62 ± 0.82, P = 0.052 |
| Trunk fat percentage (per %) |                                   |                        |                        |                               |                        |                        |
| r                            | −0.20, P = 0.10                   | −0.07, P = 0.58        | 0.25, P = 0.03         | −0.42, P = 0.0005             | −0.36, P = 0.003       | 0.31, P = 0.01         |
| β ± SE*                      | −0.44 ± 0.33, P = 0.18            | −0.82 ± 2.12, P = 0.70 | 1.00 ± 0.60, P = 0.10  | −1.18 ± 0.25, P < 0.0001      | −3.78 ± 1.46, P = 0.01 | 1.02 ± 0.49, P = 0.04  |
| β ± SE†                      | −0.48 ± 0.35, P = 0.17            | −1.07 ± 2.26, P = 0.64 | 0.93 ± 0.64, P = 0.15  | −1.18 ± 0.25, P < 0.0001      | −3.85 ± 1.46, P = 0.01 | 1.00 ± 0.49, P = 0.04  |
| WB lean mass (per kg)        |                                   |                        |                        |                               |                        |                        |
| r                            | 0.11, P = 0.36                    | 0.22, P = 0.059        | −0.25, P = 0.04        | −0.07, P = 0.55               | 0.06, P = 0.65         | −0.05, P = 0.69        |
| β ± SE*                      | 0.05 ± 0.04, P = 0.90             | 3.04 ± 2.63, P = 0.25  | 0.22 ± 0.76, P = 0.77  | −0.31 ± 0.33, P = 0.36        | −1.81 ± 1.77, P = 0.31 | 0.56 ± 0.58, P = 0.33  |
| β ± SE†                      | 0.06 ± 0.04, P = 0.90             | 3.02 ± 2.66, P = 0.26  | 0.16 ± 0.77, P = 0.83  | −0.31 ± 0.34, P = 0.37        | −1.88 ± 0.77, P = 0.29 | 0.53 ± 0.58, P = 0.36  |

Data are expressed as the mean ± SD, unless otherwise indicated. Boldface type indicates statistical significance (P < 0.05). WB, whole body. \*β ± SE adjusted for age, sex, and HbA<sub>1c</sub>. †β ± SE adjusted for age, sex, HbA<sub>1c</sub>, and SBP.

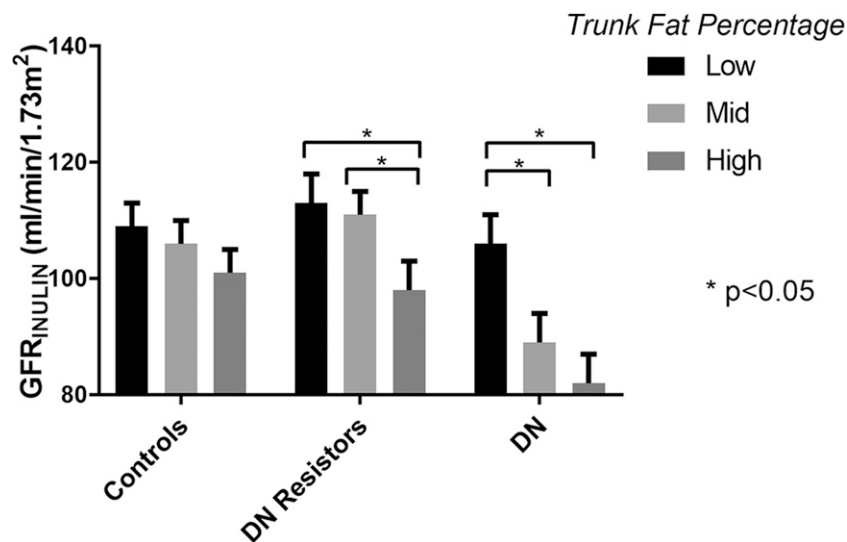

Figure 1—Sex-adjusted means of GFR across tertiles of trunk fat percentage.

associations remained significant in multivariable models.

Differences in sex-adjusted GFR<sub>INULIN</sub>, ERPF<sub>PAH</sub>, and RVR values across tertiles of trunk fat percentage for control subjects, DN Resistors, and patients with DN are shown in Fig. 1 and Supplementary Figs. 1 and 2, respectively. In control subjects, there were no significant differences in GFR, ERPF, or RVR values across tertiles of trunk fat percentage. In DN Resistors, participants in the high tertile for trunk fat percentage had lower GFR and ERPF values and higher RVR values compared with those in the low tertile. In patients with DN, participants in the high tertile for trunk fat percentage had lower GFR values compared with those in the middle and low tertiles. Although the differences in ERPF<sub>PAH</sub> values across the tertiles of trunk fat percentage did not significantly differ in participants with DN, participants in the middle fat percentage tertile had higher RVR values than those in the low and high tertiles.

## CONCLUSIONS

Although adults with long-standing type 1 diabetes had lower levels of whole-body fat compared with control subjects, the measures of central and whole-body adiposity were not associated with intrarenal hemodynamic dysfunction in control subjects. Conversely, strong associations with adiposity were observed specifically in those with type 1 diabetes with measures of intrarenal hemodynamic function. In adults with type 1 diabetes, greater

central adiposity strongly correlated with lower GFR<sub>INULIN</sub> and ERPF<sub>PAH</sub> values and with higher  $R_A$  and RVR values. When stratified by DN status, there were similarities and differences in the relationships between adiposity and intrarenal hemodynamic function in both groups. Whereas central adiposity negatively correlated with GFR<sub>INULIN</sub> in both adults with DN and DN Resistors, central adiposity was associated with lower  $R_E$  and FF values in adults with DN compared with greater  $R_A$ ,  $R_E$ , FF, and RVR values in DN Resistors. How intrarenal hemodynamic function (e.g.,  $R_A$ ,  $R_E$ , FF, and RVR) relates differently to central adiposity in adults with long-standing type 1 diabetes with and without DN is unclear, but may be explained by the central obesity paradox. In other words, the attenuated associations among central obesity, ERPF<sub>PAH</sub>, and RVR and the inverse relationship with FF and  $R_E$  may represent adaptive changes of adipocytes in response to DN in adults with long-standing type 1 diabetes.

Obesity has reached epidemic proportions worldwide. In North America, obesity affects more than one-third of the adult population, and in the U.S. alone obesity accounts for >\$140 billion in annual medical costs (20,21). The prevalence of overweight and obesity has also increased among individuals with type 1 diabetes (4–7). The incidence of obesity was recently reported to be 37% in one cohort of adults with newly diagnosed type 1 diabetes (22), and 78% of men in the urological assessment component of the Epidemiology of Diabetes Interventions

and Complications (EDIC) study were overweight or obese (23). These data are unfortunately not unique to North America, with similar prevalence and incidence observed in adults with type 1 diabetes in Australia (24) and Israel (25). Large epidemiologic studies show that central adiposity confers a higher risk of incident CKD (26–28). Similar findings have also been observed in translational studies that demonstrated that central obesity is associated with unfavorable renal hemodynamic function, including lower GFR and ERPF (13), but also abnormally elevated GFR and ERPF early in the course of the disease (29). Although controversial, epidemiologic data suggest that once CKD is established, obesity may paradoxically be associated with improved survival, especially in those with advanced CKD and ESRD (the central obesity paradox) (11). It is also important to note that the association between central fat distribution and impaired renal function is not limited to obese people. Pinto-Sietsma et al. (30) demonstrated relative renal impairment in lean participants with a central pattern of fat distribution, which suggests that the central distribution of fat may be more important than whole-body fat in determining renal risk.

Despite compelling evidence linking central obesity and kidney disease, the mechanisms underlying this relationship remain unclear. Studies suggest that central adiposity may contribute to kidney disease by indirect and direct mechanisms. The indirect mechanisms are often ascribed to the associated comorbidities, including insulin resistance, hypertension, dyslipidemia, and diabetes (30–33). Adiposity may also directly affect renal function via alterations in intrarenal hemodynamics, oxidative stress, and the numbers of proinflammatory adipokines and cytokines (34,35). For example, adipocytes may directly synthesize proinflammatory cytokines such as tumor necrosis factor- $\alpha$  and interleukin-6 that have been implicated in the development of CKD (36,37). Greater concentrations of leptin in obesity has also been associated with increased oxidative stress, sympathetic nervous system activity, glomerulosclerosis, and proteinuria (38).

Notwithstanding the obesity epidemic and DN continuing to be the leading cause of ESRD and dialysis in the Western world, human physiology studies characterizing the relationships between central



**Table 3—Relationships between adiposity and measured parameters of intrarenal hemodynamic function in adults with type 1 diabetes with and without DN**

| Variables                                                                                                                                                                                               | DN Resistors                   |                                 |                               |  | Adults with DN                 |                               |                               |  |
|---------------------------------------------------------------------------------------------------------------------------------------------------------------------------------------------------------|--------------------------------|---------------------------------|-------------------------------|--|--------------------------------|-------------------------------|-------------------------------|--|
|                                                                                                                                                                                                         | GFR <sub>INULIN</sub>          | ERPF <sub>PAH</sub>             | RVR                           |  | GFR <sub>INULIN</sub>          | ERPF <sub>PAH</sub>           | RVR                           |  |
| WB adiposity                                                                                                                                                                                            |                                |                                 |                               |  |                                |                               |                               |  |
| WB fat mass (per kg)                                                                                                                                                                                    |                                |                                 |                               |  |                                |                               |                               |  |
| <i>r</i>                                                                                                                                                                                                | −0.41, <i>P</i> = 0.007        | −0.46, <i>P</i> = 0.002         | 0.45, <i>P</i> = 0.003        |  | −0.35, <i>P</i> = 0.11         | 0.28, <i>P</i> = 0.20         | −0.22, <i>P</i> = 0.33        |  |
| β ± SE*                                                                                                                                                                                                 | −0.98 ± 0.34, <i>P</i> = 0.007 | −4.46 ± 2.03, <i>P</i> = 0.03   | 1.53 ± 0.64, <i>P</i> = 0.02  |  | −1.04 ± 0.44, <i>P</i> = 0.03  | 1.31 ± 2.10, <i>P</i> = 0.54  | −0.03 ± 0.80, <i>P</i> = 0.97 |  |
| β ± SE†                                                                                                                                                                                                 | −0.99 ± 0.35, <i>P</i> = 0.007 | −4.50 ± 2.04, <i>P</i> = 0.03   | 1.51 ± 0.64, <i>P</i> = 0.02  |  | −0.98 ± 0.45, <i>P</i> = 0.046 | 1.12 ± 2.18, <i>P</i> = 0.61  | −0.01 ± 0.83, <i>P</i> = 0.89 |  |
| WB fat percentage (per %)                                                                                                                                                                               |                                |                                 |                               |  |                                |                               |                               |  |
| <i>r</i>                                                                                                                                                                                                | −0.28, <i>P</i> = 0.07         | −0.39, <i>P</i> = 0.009         | 0.33, <i>P</i> = 0.03         |  | −0.33, <i>P</i> = 0.13         | 0.12, <i>P</i> = 0.60         | −0.06, <i>P</i> = 0.81        |  |
| β ± SE*                                                                                                                                                                                                 | −1.28 ± 0.40, <i>P</i> = 0.003 | −5.40 ± 2.37, <i>P</i> = 0.03   | 1.65 ± 0.77, <i>P</i> = 0.04  |  | −1.42 ± 0.52, <i>P</i> = 0.02  | 0.40 ± 2.64, <i>P</i> = 0.88  | −0.11 ± 1.00, <i>P</i> = 0.91 |  |
| β ± SE†                                                                                                                                                                                                 | −1.28 ± 0.40, <i>P</i> = 0.003 | −5.44 ± 2.39, <i>P</i> = 0.03   | 1.63 ± 0.77, <i>P</i> = 0.04  |  | −1.40 ± 0.52, <i>P</i> = 0.02  | 0.34 ± 2.70, <i>P</i> = 0.90  | −0.13 ± 1.02, <i>P</i> = 0.90 |  |
| BMI (per kg/m <sup>2</sup> )                                                                                                                                                                            |                                |                                 |                               |  |                                |                               |                               |  |
| <i>r</i>                                                                                                                                                                                                | −0.29, <i>P</i> = 0.053        | −0.35, <i>P</i> = 0.02          | 0.35, <i>P</i> = 0.02         |  | −0.36, <i>P</i> = 0.10         | 0.24, <i>P</i> = 0.29         | −0.28, <i>P</i> = 0.20        |  |
| β ± SE*                                                                                                                                                                                                 | −0.97 ± 0.68, <i>P</i> = 0.16  | −5.61 ± 3.80, <i>P</i> = 0.15   | 1.84 ± 1.22, <i>P</i> = 0.14  |  | −1.96 ± 0.77, <i>P</i> = 0.02  | 0.57 ± 3.82, <i>P</i> = 0.88  | −0.38 ± 1.44, <i>P</i> = 0.79 |  |
| β ± SE†                                                                                                                                                                                                 | −1.02 ± 0.69, <i>P</i> = 0.15  | −5.92 ± 3.85, <i>P</i> = 0.13   | 1.70 ± 1.23, <i>P</i> = 0.17  |  | −1.85 ± 0.82, <i>P</i> = 0.04  | −0.00 ± 4.04, <i>P</i> = 0.99 | 0.17 ± 1.53, <i>P</i> = 0.91  |  |
| Central body adiposity                                                                                                                                                                                  |                                |                                 |                               |  |                                |                               |                               |  |
| Trunk fat mass (per kg)                                                                                                                                                                                 |                                |                                 |                               |  |                                |                               |                               |  |
| <i>r</i>                                                                                                                                                                                                | −0.44, <i>P</i> = 0.004        | −0.53, <i>P</i> = 0.0002        | 0.53, <i>P</i> = 0.0003       |  | −0.43, <i>P</i> = 0.047        | 0.33, <i>P</i> = 0.14         | −0.27, <i>P</i> = 0.22        |  |
| β ± SE*                                                                                                                                                                                                 | −1.84 ± 0.64, <i>P</i> = 0.006 | −10.34 ± 3.62, <i>P</i> = 0.007 | 3.54 ± 1.14, <i>P</i> = 0.004 |  | −1.69 ± 0.66, <i>P</i> = 0.02  | 3.28 ± 3.19, <i>P</i> = 0.32  | −0.54 ± 1.23, <i>P</i> = 0.66 |  |
| β ± SE†                                                                                                                                                                                                 | −1.86 ± 0.64, <i>P</i> = 0.006 | −10.47 ± 3.65, <i>P</i> = 0.007 | 3.48 ± 1.14, <i>P</i> = 0.004 |  | −1.60 ± 0.69, <i>P</i> = 0.03  | 3.04 ± 3.32, <i>P</i> = 0.37  | −0.70 ± 1.28, <i>P</i> = 0.59 |  |
| Trunk fat percentage (per %)                                                                                                                                                                            |                                |                                 |                               |  |                                |                               |                               |  |
| <i>r</i>                                                                                                                                                                                                | −0.32, <i>P</i> = 0.03         | −0.47, <i>P</i> = 0.001         | 0.41, <i>P</i> = 0.006        |  | −0.50, <i>P</i> = 0.02         | 0.16, <i>P</i> = 0.48         | −0.11, <i>P</i> = 0.63        |  |
| β ± SE*                                                                                                                                                                                                 | −1.05 ± 0.33, <i>P</i> = 0.004 | −5.85 ± 1.93, <i>P</i> = 0.004  | 1.83 ± 0.62, <i>P</i> = 0.006 |  | −1.22 ± 0.38, <i>P</i> = 0.005 | 0.98 ± 2.01, <i>P</i> = 0.63  | −0.27 ± 0.76, <i>P</i> = 0.72 |  |
| β ± SE†                                                                                                                                                                                                 | −1.06 ± 0.34, <i>P</i> = 0.004 | −5.94 ± 1.95, <i>P</i> = 0.004  | 1.79 ± 0.62, <i>P</i> = 0.007 |  | −1.19 ± 0.38, <i>P</i> = 0.007 | 0.89 ± 2.06, <i>P</i> = 0.67  | −0.32 ± 0.78, <i>P</i> = 0.69 |  |
| WB lean mass (per kg)                                                                                                                                                                                   |                                |                                 |                               |  |                                |                               |                               |  |
| <i>r</i>                                                                                                                                                                                                | −0.17, <i>P</i> = 0.29         | −0.04, <i>P</i> = 0.82          | 0.08, <i>P</i> = 0.63         |  | −0.07, <i>P</i> = 0.75         | 0.13, <i>P</i> = 0.57         | −0.18, <i>P</i> = 0.43        |  |
| β ± SE*                                                                                                                                                                                                 | −0.22 ± 0.38, <i>P</i> = 0.57  | −2.06 ± 2.13, <i>P</i> = 0.34   | 0.52 ± 0.69, <i>P</i> = 0.46  |  | −0.11 ± 0.88, <i>P</i> = 0.90  | 2.53 ± 3.66, <i>P</i> = 0.50  | 0.84 ± 1.39, <i>P</i> = 0.55  |  |
| β ± SE†                                                                                                                                                                                                 | −0.21 ± 0.39, <i>P</i> = 0.59  | −1.98 ± 2.17, <i>P</i> = 0.37   | 0.60 ± 0.69, <i>P</i> = 0.39  |  | −0.39 ± 1.00, <i>P</i> = 0.70  | 1.96 ± 4.29, <i>P</i> = 0.65  | 0.58 ± 1.62, <i>P</i> = 0.73  |  |
| Boldface type indicates statistical significance ( <i>P</i> < 0.05). WB, whole body. *β ± SE adjusted for age, sex, and HbA <sub>1c</sub> . †β ± SE adjusted for age, sex, HbA <sub>1c</sub> , and SBP. |                                |                                 |                               |  |                                |                               |                               |  |

Boldface type indicates statistical significance (*P* < 0.05). WB, whole body. \* $\beta \pm \text{SE}$  adjusted for age, sex, and HbA<sub>1c</sub>. † $\beta \pm \text{SE}$  adjusted for age, sex, HbA<sub>1c</sub>, and SBP.

adiposity and intrarenal hemodynamics in type 1 diabetes are lacking. The current set of studies allowed us to define the relationships between adiposity and gold standard measures of intrarenal hemodynamic function in control subjects without diabetes and adults with long-standing type 1 diabetes of extreme phenotypes (DN vs. DN Resistors). Whereas, adults with type 1 diabetes had lower whole-body and central adiposity compared with their peers without diabetes, we demonstrated type 1 diabetes-specific interactions between adiposity and intrarenal hemodynamic function. Furthermore, some of these relationships differed between adults with DN and DN Resistors. In adults with type 1 diabetes without DN, central adiposity is related to increased afferent and efferent arteriolar tone, higher RVR, higher FF, and lower RBF. Conversely, in adults with type 1 diabetes with DN, greater central adiposity was associated with lower efferent arteriolar tone and consequently lower FF. Interestingly, there were no associations among central adiposity, RBF, or RVR in adults with type 1 diabetes with DN. Notably, greater central obesity related to lower  $GFR_{INULIN}$  values in both adults with DN and DN Resistors. Why certain intrarenal hemodynamic parameters relate differently to central adiposity in adults with long-standing type 1 diabetes with and without DN remains unclear. Several mechanisms may explain the paradoxical relationship observed between central obesity and certain intrarenal hemodynamic parameters in adults with long-standing type 1 diabetes and DN, such as adaptive changes of adipocytes. Adipocytes may directly play a role by altering their production of adipokines, including adiponectin, which improves podocyte function and reduces albuminuria (39). Alternatively, the impairment of intrarenal hemodynamic function in patients with DN might lead to attenuated responsiveness to adipocyte signaling.

There are limitations to the current study worth mentioning, including the small sample size and cross-sectional design, that do not allow us to determine causality. To ensure meaningful analyses, we performed careful a priori power calculations and deep phenotyping of intrarenal hemodynamic function and adiposity. To gain additional information about the human intrarenal circulation in vivo, we used Gomez equations to

calculate  $R_A$ ,  $R_E$ ,  $P_{GLO}$ , and filtration pressure (19). Although the control, DN Resistor, and DN groups were similar demographically by design, we cannot rule out the presence of differences in unmeasured variables or residual confounding. Furthermore, findings from this study may not be generalizable to youth with type 1 diabetes or individuals with type 1 diabetes of short duration. The longevity cohort is also subject to survivorship bias since participants had to survive 50 years with type 1 diabetes to be eligible for the study, and those with progressive or advanced nephropathy may not have been captured because of related mortality, which limits the overall generalizability of the findings. Finally, our analyses were considered to be exploratory and hypothesis generating, and adjustments for multiple comparisons were not used. The strengths of this study include direct measures of GFR and ERPF by inulin and PAH, along with central adiposity by DXA in a cohort of control subjects and adults with type 1 diabetes at extreme phenotypes (DN vs. DN Resistors).

In conclusion, we demonstrated strong relationships among whole-body, central adiposity, and intrarenal hemodynamic function in adults with long-standing type 1 diabetes, but not in control subjects. There were also important differences between DN and DN Resistors among the adults with type 1 diabetes. When taken together, our observations suggest that the adiposity-intrarenal hemodynamic function relationships may vary according to DN status. The mechanisms discriminating the relationships between adiposity and intrarenal hemodynamic function in DN and DN Resistors in adults with long-standing type 1 diabetes are not known but could be explained by the central obesity paradox observed in CKD cohorts without diabetes.

**Funding.** The Canadian Study of Longevity in Diabetes was funded by JDRF (operating grant no. 17-2013-312). P.B. is funded by National Institutes of Health National Institute of Diabetes and Digestive and Kidney Diseases training grant T32-DK063687, the Thrasher Foundation Early Career Award, a JDRF-International Society for Pediatric and Adolescent Diabetes Research Fellowship, and the Center for Women's Health Research at the University of Colorado. D.Z.I.C. was supported by operating grants from the Canadian Institutes of Health Research and the Banting & Best Diabetes Centre, University of Toronto. Salary support was provided by

a Department of Medicine, University of Toronto Merit Award. Aspects of this research were supported by the Steven and Ofra Menkes Fund. **Quality of Interest.** P.B. has a consultancy agreement with Boehringer Ingelheim but has not yet received any consulting fees from them. J.A.L. has received consulting fees, speaker honoraria, or both from Novo Nordisk, Eli Lilly & Co., Merck Sharp & Dohme, and AstraZeneca. G.B. has received speaker honoraria from Johnson & Johnson. H.A.K. has received support from Sanofi. B.A.P. has received speaker honoraria from Medtronic, Johnson & Johnson, Roche, GlaxoSmithKline Canada, Novo Nordisk, and Sanofi; has received research grant support from Medtronic and Boehringer Ingelheim; and serves as a consultant for NeuroMetrix. D.Z.I.C. has received consulting fees, speaker honoraria, or both from Janssen, Boehringer Ingelheim, Eli Lilly & Co., AstraZeneca, Merck, and Sanofi and has received operating funds from Janssen, Boehringer Ingelheim, Eli Lilly & Co., AstraZeneca, and Merck. No other potential conflicts of interest relevant to this article were reported.

**Author Contributions.** P.B. researched and performed statistical analysis of the data and prepared the manuscript. J.A.L., G.B., M.A.F., and A.O. collected the data and reviewed the manuscript for scholarly content. Y.L., O.N.A., V.L., J.T., L.C., D.S., A.W., H.A.K., M.H.B., N.P., and V.B. reviewed the manuscript. L.E.L. researched the data and prepared the manuscript. B.A.P. and D.Z.I.C. created the hypothesis and objective, designed the study, and prepared the manuscript. D.Z.I.C. is the guarantor of this work and, as such, had full access to all the data in the study and takes responsibility for the integrity of the data and the accuracy of the data analysis.

## References

- Orchard TJ, Secrest AM, Miller RG, Costacou T. In the absence of renal disease, 20 year mortality risk in type 1 diabetes is comparable to that of the general population: a report from the Pittsburgh Epidemiology of Diabetes Complications Study. *Diabetologia* 2010;53:2312–2319
- Bjornstad P, Maahs DM, Duca LM, et al. Estimated insulin sensitivity predicts incident micro- and macrovascular complications in adults with type 1 diabetes over 6 years: the coronary artery calcification in type 1 diabetes study. *J Diabetes Complications* 2016;30:586–590
- Bjornstad P, Snell-Bergeon JK, Rewers M, et al. Early diabetic nephropathy: a complication of reduced insulin sensitivity in type 1 diabetes. *Diabetes Care* 2013;36:3678–3683
- Redondo MJ, Foster NC, Libman IM, et al. Prevalence of cardiovascular risk factors in youth with type 1 diabetes and elevated body mass index. *Acta Diabetol* 2016;53:271–277
- Baskaran C, Volkening LK, Diaz M, Laffel LM. A decade of temporal trends in overweight/obesity in youth with type 1 diabetes after the Diabetes Control and Complications Trial. *Pediatr Diabetes* 2015;16:263–270
- Minges KE, Whittemore R, Grey M. Overweight and obesity in youth with type 1 diabetes. *Annu Rev Nurs Res* 2013;31:47–69
- Liu LL, Lawrence JM, Davis C, et al.; SEARCH for Diabetes in Youth Study Group. Prevalence of overweight and obesity in youth with diabetes in USA: the SEARCH for Diabetes in Youth study. *Pediatr Diabetes* 2010;11:4–11



8. Vehik K, Hamman RF, Lezotte D, et al. Increasing incidence of type 1 diabetes in 0- to 17-year-old Colorado youth. *Diabetes Care* 2007;30:503–509
9. Abi Khalil C, Sulaiman K, Singh R, et al. BMI is inversely correlated to the risk of mortality in patients with type 2 diabetes hospitalized for acute heart failure: findings from the Gulf aCute heArt failuRE (Gulf-CARE) registry. *Int J Cardiol* 2017;241:262–269
10. Park J, Ahmadi SF, Streja E, et al. Obesity paradox in end-stage kidney disease patients. *Prog Cardiovasc Dis* 2014;56:415–425
11. Kalantar-Zadeh K, Rhee CM, Amin AN. To legitimize the contentious obesity paradox. *Mayo Clin Proc* 2014;89:1033–1035
12. Rhee CM, Ahmadi SF, Kalantar-Zadeh K. The dual roles of obesity in chronic kidney disease: a review of the current literature. *Curr Opin Nephrol Hypertens* 2016;25:208–216
13. Kwakernaak AJ, Zelle DM, Bakker SJ, Navis G. Central body fat distribution associates with unfavorable renal hemodynamics independent of body mass index. *J Am Soc Nephrol* 2013;24:987–994
14. Scaglione R, Ganguzza A, Corrao S, et al. Central obesity and hypertension: pathophysiologic role of renal haemodynamics and function. *Int J Obes Relat Metab Disord* 1995;19:403–409
15. Sochett EB, Cherney DZ, Curtis JR, Dekker MG, Scholey JW, Miller JA. Impact of renin-angiotensin system modulation on the hyperfiltration state in type 1 diabetes. *J Am Soc Nephrol* 2006;17:1703–1709
16. Miller JA, Curtis JR, Sochett EB. Relationship between diurnal blood pressure, renal hemodynamic function, and the renin-angiotensin system in type 1 diabetes. *Diabetes* 2003;52:1806–1811
17. Page A, Reich H, Zhou J, et al. Endothelial nitric oxide synthase gene/gender interactions and the renal hemodynamic response to angiotensin II. *J Am Soc Nephrol* 2005;16:3053–3060
18. Chidambaram M, Duncan JA, Lai VS, et al. Variation in the renin-angiotensin system throughout the normal menstrual cycle. *J Am Soc Nephrol* 2002;13:446–452
19. Bjornstad P, Škrčić M, Lytvyn Y, Maahs DM, Johnson RJ, Cherney DZ. The Gomezi equations and renal hemodynamic function in kidney disease research. *Am J Physiol Renal Physiol*. 7 September 2016 [Epub ahead of print]. DOI: 10.1152/ajprenal.00415.2016
20. Ogden CL, Carroll MD, Kit BK, Flegal KM. Prevalence of childhood and adult obesity in the United States, 2011–2012. *JAMA* 2014;311:806–814
21. Finkelstein EA, Trogon JG, Cohen JW, Dietz W. Annual medical spending attributable to obesity: payer- and service-specific estimates. *Health Aff (Millwood)* 2009;28:w822–w831
22. Furlanos S, Elkassaby S, Varney MD, Colman PG, Harrison LC. Higher body mass index in adults at diagnosis of the slowly progressive form of type 1 diabetes mellitus is associated with lower risk HLA genes. *Diabetes Res Clin Pract* 2014;104:e69–e71
23. Holt SK, Lopushnyan N, Hotelling J, et al.; Diabetes Control and Complications Trial/Epidemiology of Diabetes Interventions and Complications Research Group. Prevalence of low testosterone and predisposing risk factors in men with type 1 diabetes mellitus: findings from the DCCT/EDIC. *J Clin Endocrinol Metab* 2014;99:E1655–E1660
24. Price SA, Gorelik A, Furlanos S, Colman PG, Wentworth JM. Obesity is associated with retinopathy and macrovascular disease in type 1 diabetes. *Obes Res Clin Pract* 2014;8:e178–e182
25. Pinhas-Hamiel O, Levek-Motola N, Kaidar K, et al. Prevalence of overweight, obesity and metabolic syndrome components in children, adolescents and young adults with type 1 diabetes mellitus. *Diabetes Metab Res Rev* 2015;31:76–84
26. Fox CS, Larson MG, Leip EP, Culleton B, Wilson PW, Levy D. Predictors of new-onset kidney disease in a community-based population. *JAMA* 2004;291:844–850
27. Tsujimoto T, Sairenchi T, Iso H, et al. The dose-response relationship between body mass index and the risk of incident stage  $\geq 3$  chronic kidney disease in a general Japanese population: the Ibaraki Prefectural Health Study (IPHS). *J Epidemiol* 2014;24:444–451
28. Wang Y, Chen X, Song Y, Caballero B, Cheskin LJ. Association between obesity and kidney disease: a systematic review and meta-analysis. *Kidney Int* 2008;73:19–33
29. Chagnac A, Weinstein T, Korzets A, Ramadan E, Hirsch J, Gaftor U. Glomerular hemodynamics in severe obesity. *Am J Physiol Renal Physiol* 2000;278:F817–F822
30. Pinto-Sietsma SJ, Navis G, Janssen WM, de Zeeuw D, Gans RO, de Jong PE; PREVEND Study Group. A central body fat distribution is related to renal function impairment, even in lean subjects. *Am J Kidney Dis* 2003;41:733–741
31. Elsayed EF, Sarnak MJ, Tighiouart H, et al. Waist-to-hip ratio, body mass index, and subsequent kidney disease and death. *Am J Kidney Dis* 2008;52:29–38
32. Wanner C, Jager KJ. Kidneys do not like excess body fat. *Lancet Diabetes Endocrinol* 2015;3:669–671
33. Lu JL, Molnar MZ, Naseer A, Mikkelsen MK, Kalantar-Zadeh K, Kovesdy CP. Association of age and BMI with kidney function and mortality: a cohort study. *Lancet Diabetes Endocrinol* 2015;3:704–714
34. Stenvinkel P, Zoccali C, Ikizler TA. Obesity in CKD—what should nephrologists know? *J Am Soc Nephrol* 2013;24:1727–1736
35. Mallamaci F, Tripepi G. Obesity and CKD progression: hard facts on fat CKD patients. *Nephrol Dial Transplant* 2013;28(Suppl. 4):iv105–iv108
36. Wickman C, Kramer H. Obesity and kidney disease: potential mechanisms. *Semin Nephrol* 2013;33:14–22
37. Stenvinkel P, Ketteler M, Johnson RJ, et al. IL-10, IL-6, and TNF- $\alpha$ : central factors in the altered cytokine network of uremia—the good, the bad, and the ugly. *Kidney Int* 2005;67:1216–1233
38. Wolf G, Ziyadeh FN. Leptin and renal fibrosis. *Contrib Nephrol* 2006;151:175–183
39. Sharma K, Ramachandrarao S, Qiu G, et al. Adiponectin regulates albuminuria and podocyte function in mice. *J Clin Invest* 2008;118:1645–1656
